# Supplementary material for: The role of alkalinity in setting water quality metrics: phosphorus standards in United Kingdom rivers
Source: Royal Society of Chemistry journal article supplement (doi:10.1039/c8em00262b), 2018-01-01
Supplement: c8em00262b1.pdf [file c8em00262b1.pdf]

**Electronic supplementary information:**

**The role of alkalinity in setting water quality metrics: Phosphorus standards in United Kingdom rivers**

**Alan D Tappin, Alba Navarro-Rodriguez, Sean D W Comber, Paul J Worsfold**

Biogeochemistry Research Centre, School of Geography, Earth and Environmental Sciences,  
Plymouth University, Drake Circus, Plymouth PL4 8AA, UK

ESI 1. Example calculation of Source Apportionment Model

Tamar Polson Bridge

Alkalinity loads

| STW (DWF)   |            |            | GW          |            |            | Diffuse     |            |            | Total flow | Total load | % load | % load | % load  |
|-------------|------------|------------|-------------|------------|------------|-------------|------------|------------|------------|------------|--------|--------|---------|
| Flow (m3/s) | Alk (g/m3) | Load (g/s) | Flow (m3/s) | Alk (g/m3) | Load (g/s) | Flow (m3/s) | Alk (g/m3) | Load (g/s) | (m3/s)     | (g/s)      | STW    | GW     | Diffuse |
| 0.035       | 47         | 1.65       | 0.178       | 7          | 1.26       | 0.00        | 34.40      | 0.00       | 0.21       | 2.91       | 56.6   | 43.4   | 0.0     |
| 0.035       | 47         | 1.65       | 0.178       | 7          | 1.26       | 0.13        | 34.40      | 4.30       | 0.34       | 7.21       | 22.8   | 17.5   | 59.6    |
| 0.035       | 47         | 1.65       | 0.178       | 7          | 1.26       | 0.25        | 34.40      | 8.60       | 0.46       | 11.51      | 14.3   | 11.0   | 74.7    |
| 0.035       | 47         | 1.65       | 0.178       | 7          | 1.26       | 0.50        | 34.40      | 17.20      | 0.71       | 20.11      | 8.2    | 6.3    | 85.5    |
| 0.035       | 47         | 1.65       | 0.178       | 7          | 1.26       | 0.75        | 34.40      | 25.80      | 0.96       | 28.71      | 5.7    | 4.4    | 89.9    |
| 0.035       | 47         | 1.65       | 0.178       | 7          | 1.26       | 1.00        | 34.40      | 34.40      | 1.21       | 37.31      | 4.4    | 3.4    | 92.2    |
| 0.035       | 47         | 1.65       | 0.178       | 7          | 1.26       | 1.50        | 34.40      | 51.60      | 1.71       | 54.51      | 3.0    | 2.3    | 94.7    |
| 0.035       | 47         | 1.65       | 0.178       | 7          | 1.26       | 2.00        | 34.40      | 68.80      | 2.21       | 71.71      | 2.3    | 1.8    | 95.9    |
| 0.035       | 47         | 1.65       | 0.178       | 7          | 1.26       | 2.50        | 34.40      | 86.00      | 2.71       | 88.91      | 1.9    | 1.4    | 96.7    |
| 0.035       | 47         | 1.65       | 0.178       | 7          | 1.26       | 3.00        | 34.40      | 103.20     | 3.21       | 106.11     | 1.6    | 1.2    | 97.3    |
| 0.035       | 47         | 1.65       | 0.178       | 7          | 1.26       | 3.50        | 34.40      | 120.40     | 3.71       | 123.31     | 1.3    | 1.0    | 97.6    |
| 0.035       | 47         | 1.65       | 0.178       | 7          | 1.26       | 4.00        | 34.40      | 137.60     | 4.21       | 140.51     | 1.2    | 0.9    | 97.9    |
| 0.035       | 47         | 1.65       | 0.178       | 7          | 1.26       | 4.50        | 34.40      | 154.80     | 4.71       | 157.71     | 1.0    | 0.8    | 98.2    |
| 0.035       | 47         | 1.65       | 0.178       | 7          | 1.26       | 5.00        | 34.40      | 172.00     | 5.21       | 174.91     | 0.9    | 0.7    | 98.3    |
| 0.035       | 47         | 1.65       | 0.178       | 7          | 1.26       | 5.50        | 34.40      | 189.20     | 5.71       | 192.11     | 0.9    | 0.7    | 98.5    |
| 0.035       | 47         | 1.65       | 0.178       | 7          | 1.26       | 6.00        | 34.40      | 206.40     | 6.21       | 209.31     | 0.8    | 0.6    | 98.6    |
| 0.035       | 47         | 1.65       | 0.178       | 7          | 1.26       | 6.50        | 34.40      | 223.60     | 6.71       | 226.51     | 0.7    | 0.6    | 98.7    |
| 0.035       | 47         | 1.65       | 0.178       | 7          | 1.26       | 7.00        | 34.40      | 240.80     | 7.21       | 243.71     | 0.7    | 0.5    | 98.8    |
| 0.035       | 47         | 1.65       | 0.178       | 7          | 1.26       | 7.50        | 34.40      | 258.00     | 7.71       | 260.91     | 0.6    | 0.5    | 98.9    |
| 0.035       | 47         | 1.65       | 0.178       | 7          | 1.26       | 8.00        | 34.40      | 275.20     | 8.21       | 278.11     | 0.6    | 0.5    | 99.0    |
| 0.035       | 47         | 1.65       | 0.178       | 7          | 1.26       | 8.50        | 34.40      | 292.40     | 8.71       | 295.31     | 0.6    | 0.4    | 99.0    |
| 0.035       | 47         | 1.65       | 0.178       | 7          | 1.26       | 9.00        | 34.40      | 309.60     | 9.21       | 312.51     | 0.5    | 0.4    | 99.1    |
| 0.035       | 47         | 1.65       | 0.178       | 7          | 1.26       | 9.50        | 34.40      | 326.80     | 9.71       | 329.71     | 0.5    | 0.4    | 99.1    |
| 0.035       | 47         | 1.65       | 0.178       | 7          | 1.26       | 10.00       | 34.40      | 344.00     | 10.21      | 346.91     | 0.5    | 0.4    | 99.2    |
| 0.035       | 47         | 1.65       | 0.178       | 7          | 1.26       | 11.00       | 34.40      | 378.40     | 11.21      | 381.31     | 0.4    | 0.3    | 99.2    |
| 0.035       | 47         | 1.65       | 0.178       | 7          | 1.26       | 12.00       | 34.40      | 412.80     | 12.21      | 415.71     | 0.4    | 0.3    | 99.3    |
| 0.035       | 47         | 1.65       | 0.178       | 7          | 1.26       | 13.00       | 34.40      | 447.20     | 13.21      | 450.11     | 0.4    | 0.3    | 99.4    |
| 0.035       | 47         | 1.65       | 0.178       | 7          | 1.26       | 14.00       | 34.40      | 481.60     | 14.21      | 484.51     | 0.3    | 0.3    | 99.4    |
| 0.035       | 47         | 1.65       | 0.178       | 7          | 1.26       | 15.00       | 34.40      | 516.00     | 15.21      | 518.91     | 0.3    | 0.2    | 99.4    |
| 0.035       | 47         | 1.65       | 0.178       | 7          | 1.26       | 16.00       | 34.40      | 550.40     | 16.21      | 553.31     | 0.3    | 0.2    | 99.5    |
| 0.035       | 47         | 1.65       | 0.178       | 7          | 1.26       | 17.00       | 34.40      | 584.80     | 17.21      | 587.71     | 0.3    | 0.2    | 99.5    |
| 0.035       | 47         | 1.65       | 0.178       | 7          | 1.26       | 18.00       | 34.40      | 619.20     | 18.21      | 622.11     | 0.3    | 0.2    | 99.5    |
| 0.035       | 47         | 1.65       | 0.178       | 7          | 1.26       | 19.00       | 34.40      | 653.60     | 19.21      | 656.51     | 0.3    | 0.2    | 99.6    |
| 0.035       | 47         | 1.65       | 0.178       | 7          | 1.26       | 20.00       | 34.40      | 688.00     | 20.21      | 690.91     | 0.2    | 0.2    | 99.6    |

STW, sewage treatment works; DWF, dry weather flow; Alk, alkalinity; GW, groundwater
